# Supplementary material for: New Cd(ii) coordination polymers bearing Y-shaped tricarboxylate ligands as photocatalysts for dye degradation
Source: Royal Society of Chemistry journal article supplement (doi:10.1039/d1ce00640a), 2021-01-01
Supplement: d1ce00640a1.pdf [file d1ce00640a1.pdf]

## Supporting Information

### New Cd(II) coordination polymers bearing Y-shaped tricarboxylates ligand as photocatalysts for dye degradation

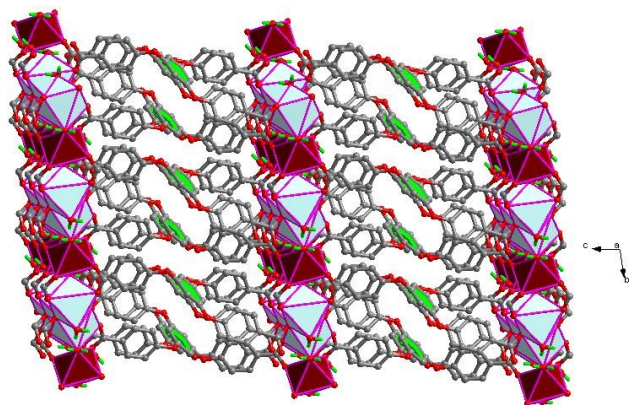

Fig. S1 view of the 3D framework in **1**.

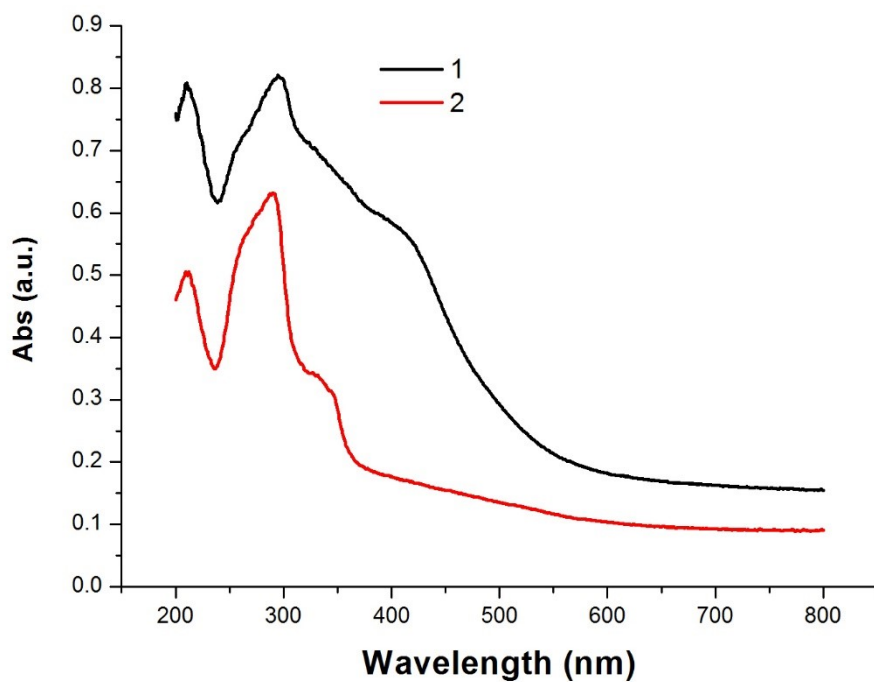

Fig. S2 Solid state UV-Vis spectra for **1** and **2**.

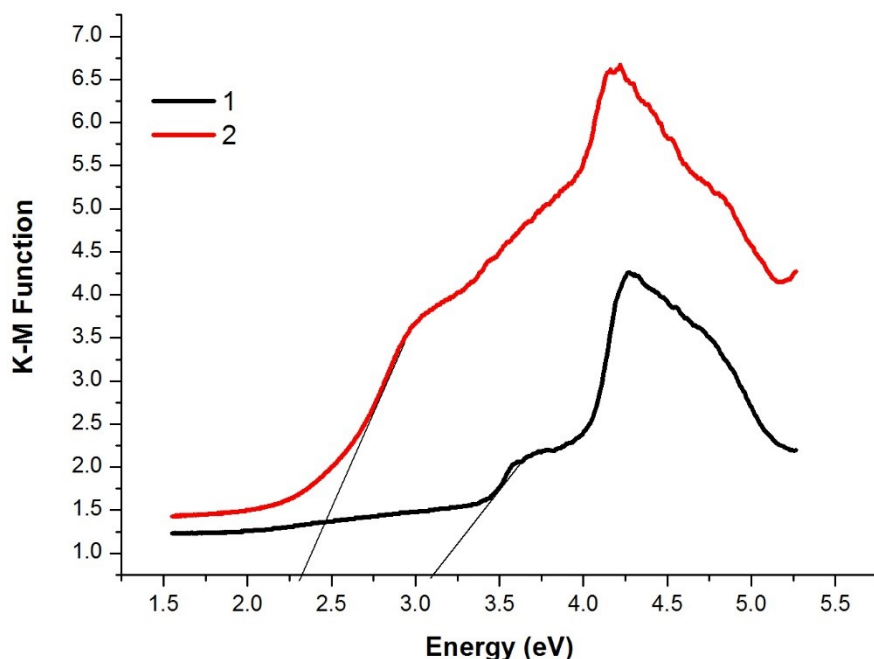

Fig. S3 Band gap calculations for 1 and 2.

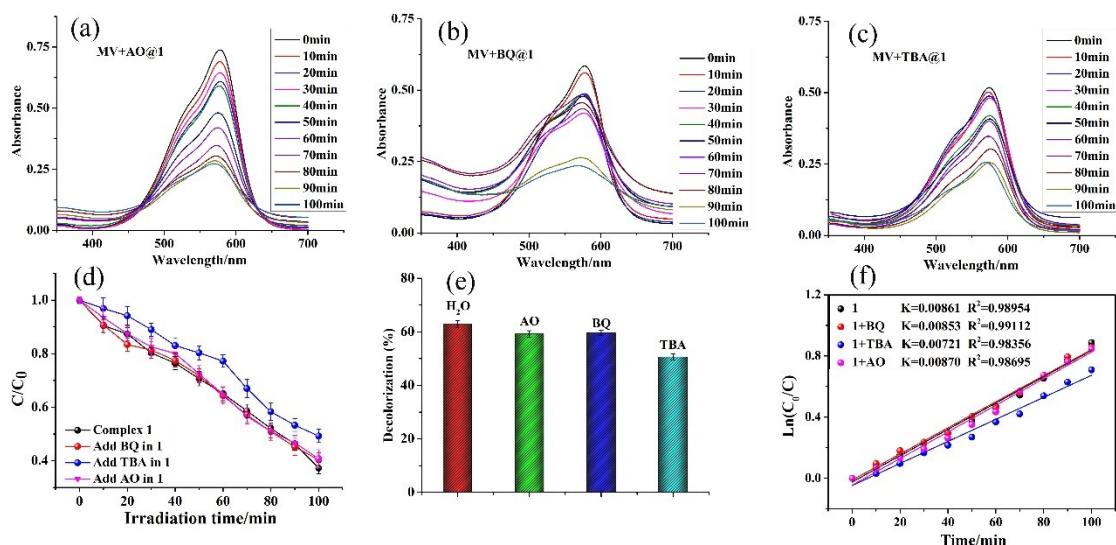

Fig. S4 (a)- (e) photodegradation of the MV solution in the different scavenger solutions in 1; (f) linear-log plot as a function of deduced mechanism of the degradation of MV by 1.

### PXPD analysis.

The PXRD patterns for CP 1 and CP 2 are presented in Figure S4, The diffraction peaks of both simulated and experimental patterns are matching, thus indicating that the phase purity of compound CP1 is good. The differences of intensity may be owing

to the preferred orientation of the crystal samples.

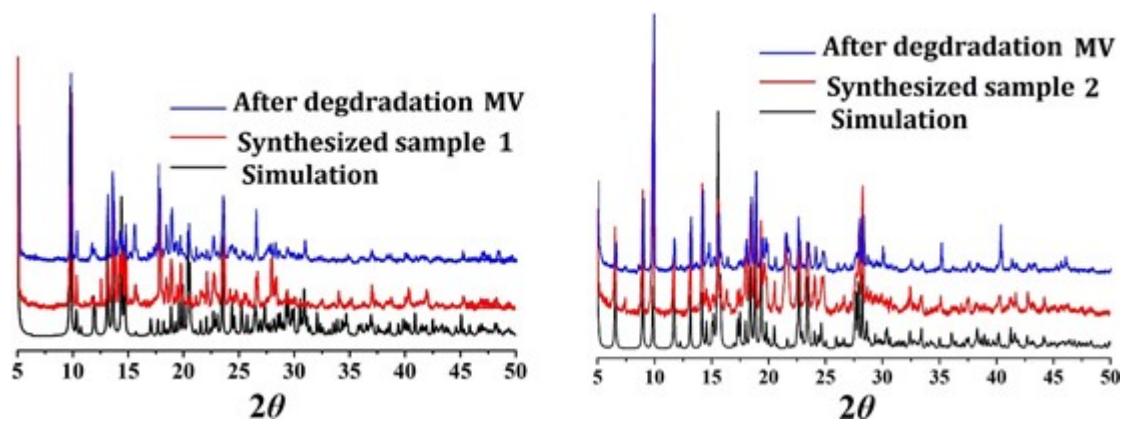

Fig. S5 PXRD plots for CPs 1 and 2.

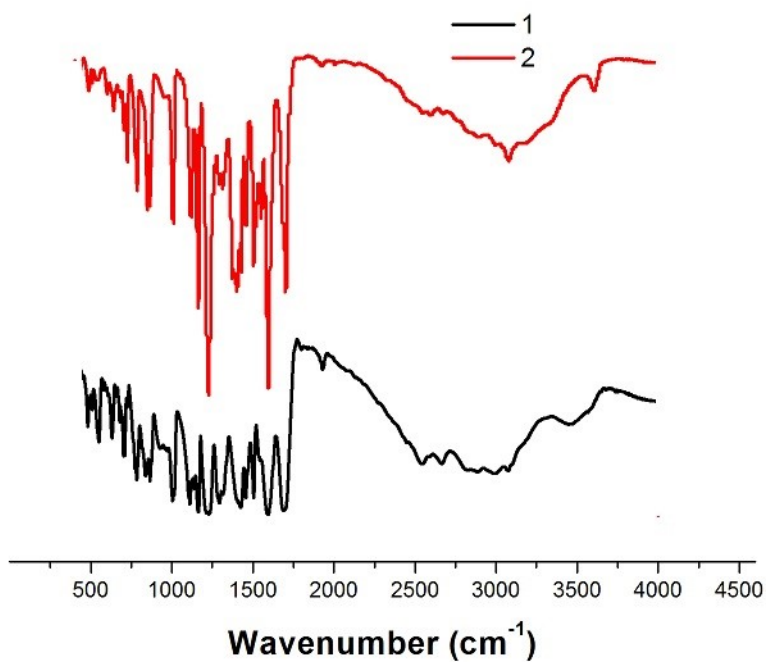

Fig. S6 FTIR spectra of CPs 1 and 2.

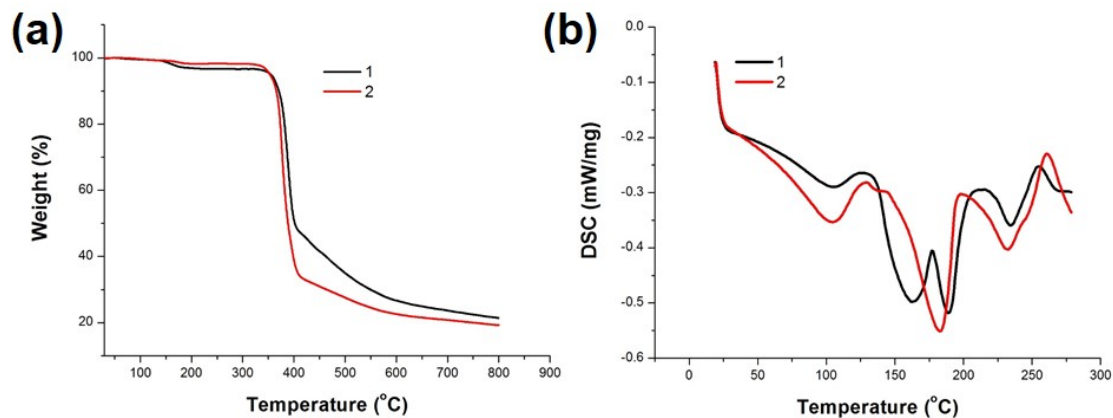

Fig. S7 (a) TGA and (b) DSC plots for **1** and **2**.

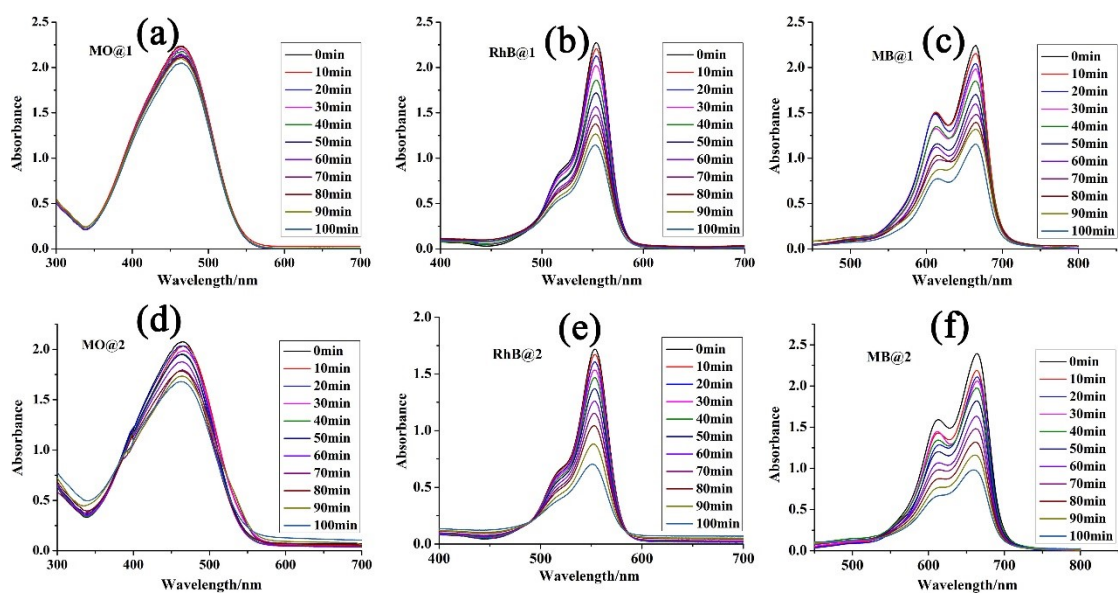

Fig. S8 Absorption spectra of the MO, Rh B and MB solutions during the decomposition reaction under UV irradiation for **1** and **2**, respectively.

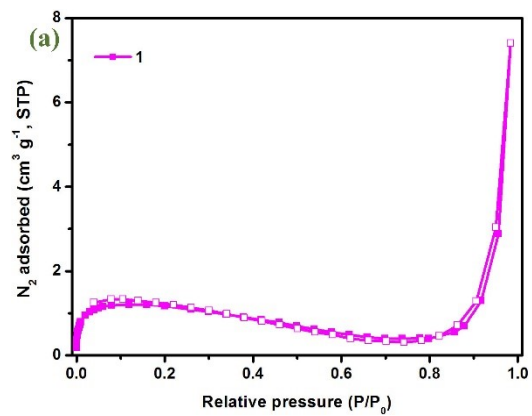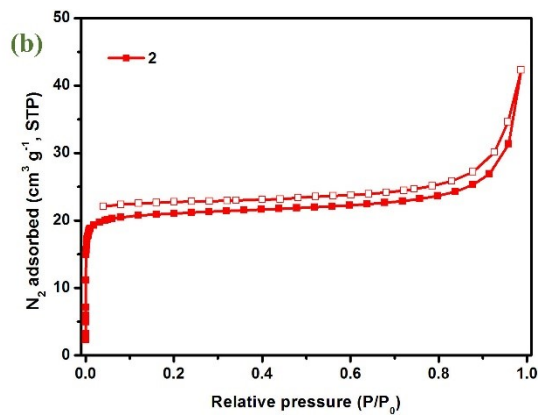

Fig. S9 BET surface area analyses for 1 and 2

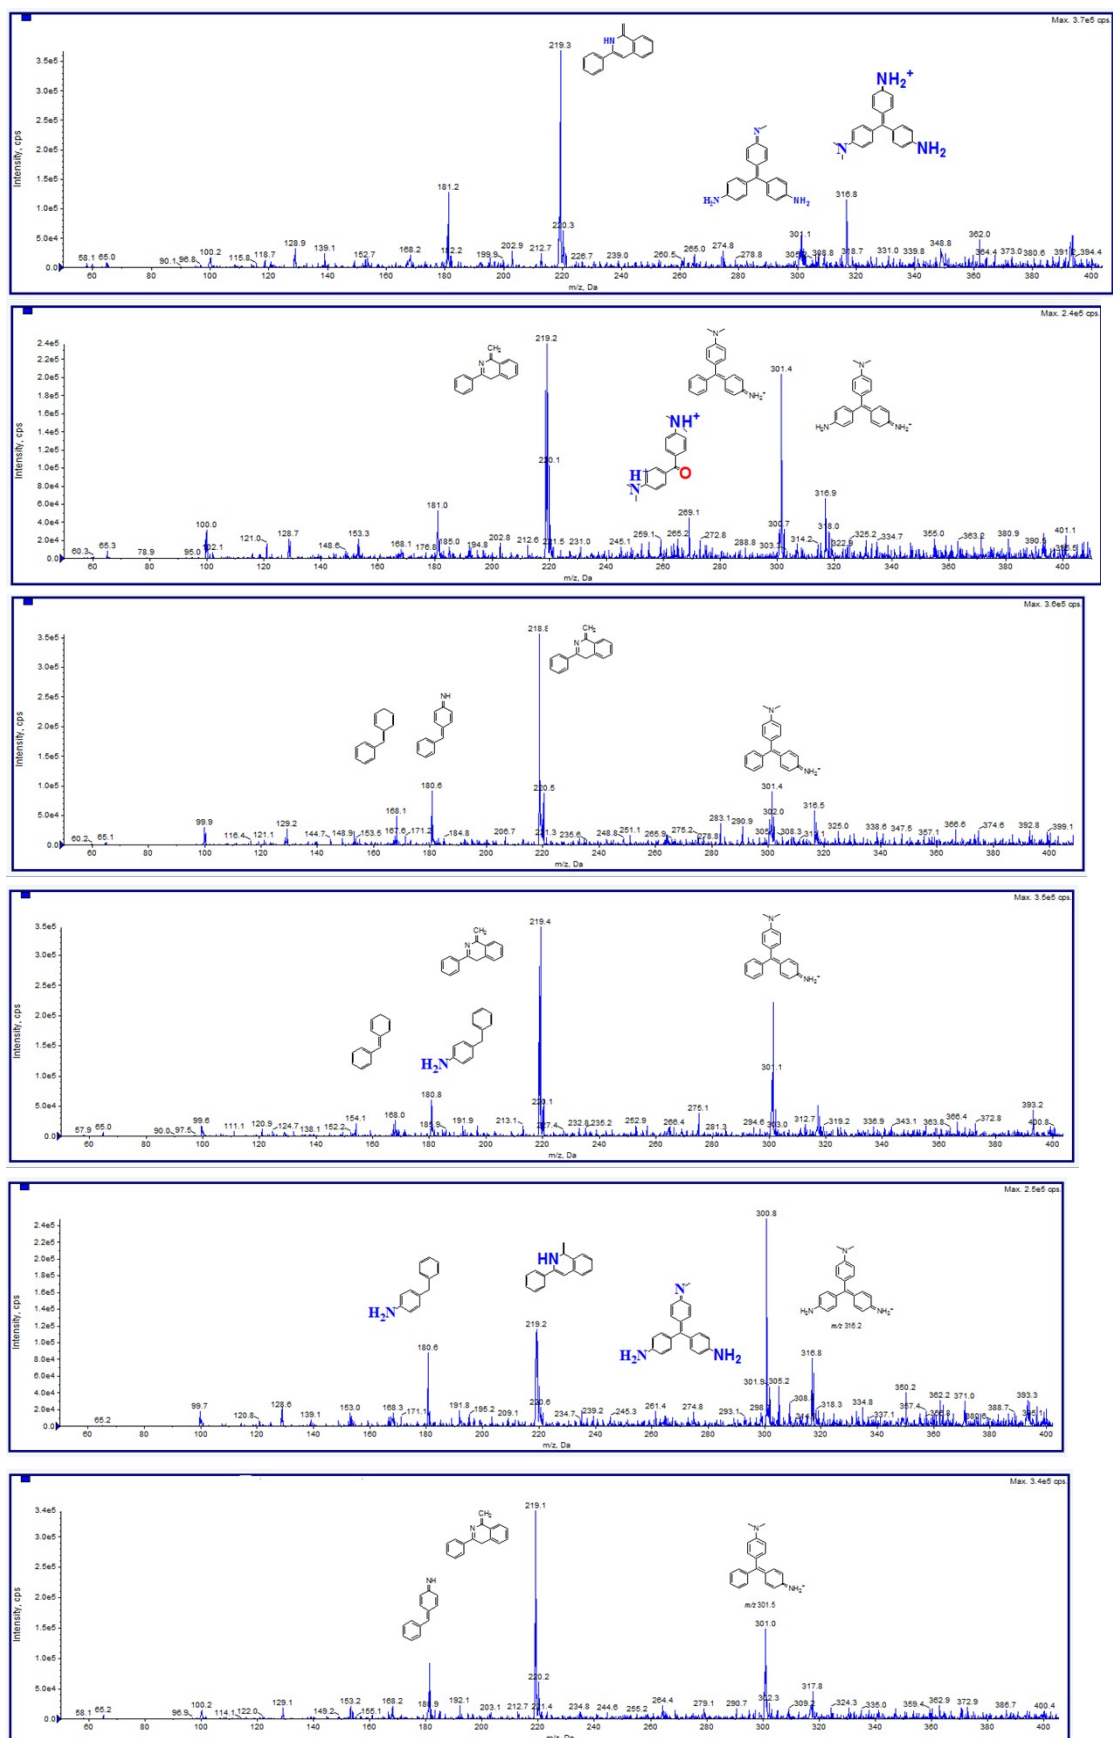

Fig. S10 Relative intensities of molecular fragments of **1** and **2** with their m/z value

**Table S1. Crystallographic data and structure refinement details for Complexes 1-2**

| Parameter                                                                             | 1                                                               | 2                                                                 |
|---------------------------------------------------------------------------------------|-----------------------------------------------------------------|-------------------------------------------------------------------|
| Formula                                                                               | C <sub>54</sub> H <sub>42</sub> O <sub>24</sub> Cd <sub>3</sub> | C <sub>39</sub> H <sub>26</sub> N <sub>2</sub> O <sub>11</sub> Cd |
| Formula weight                                                                        | 1412.07                                                         | 811.03                                                            |
| Crystal system                                                                        | Triclinic                                                       | Triclinic                                                         |
| Space group                                                                           | <i>P-1</i>                                                      | <i>P-1</i>                                                        |
| Crystal Color                                                                         | Colorless                                                       | Colorless                                                         |
| <i>a</i> , Å                                                                          | 7.9080(2)                                                       | 6.1936(5)                                                         |
| <i>b</i> , Å                                                                          | 9.0612(2)                                                       | 15.2015(12)                                                       |
| <i>c</i> , Å                                                                          | 18.6420(3)                                                      | 18.8590(14)                                                       |
| $\alpha$ , °                                                                          | 95.133(2)                                                       | 71.913(1)                                                         |
| $\beta$ , °                                                                           | 100.853(2)                                                      | 89.280(1)                                                         |
| $\gamma$ , °                                                                          | 107.104(2)                                                      | 89.947(2)                                                         |
| <i>V</i> , Å <sup>3</sup>                                                             | 1238.88(5)                                                      | 1687.7(2)                                                         |
| <i>Z</i>                                                                              | 1                                                               | 2                                                                 |
| $\rho_{\text{calcd}}$ , g/cm <sup>3</sup>                                             | 1.893                                                           | 1.596                                                             |
| $\mu$ , mm <sup>-1</sup>                                                              | 11.032                                                          | 0.716                                                             |
| <i>F</i> (000)                                                                        | 702                                                             | 820                                                               |
| $\theta$ Range, deg                                                                   | 2.4-76.0                                                        | 1.1-27.6                                                          |
| Reflection Collected                                                                  | 13015                                                           | 10362                                                             |
| Independent reflections ( <i>R</i> <sub>int</sub> )                                   | 0.039                                                           | 0.030                                                             |
| Reflections with <i>I</i> > 2 $\sigma$ ( <i>I</i> )                                   | 4652                                                            | 5107                                                              |
| Number of parameters                                                                  | 369                                                             | 485                                                               |
| <i>R</i> <sub>1</sub> , <i>wR</i> <sub>2</sub> ( <i>I</i> > 2 $\sigma$ ( <i>I</i> ))* | 0.0349, 0.0909                                                  | 0.0501, 0.0995                                                    |
| <i>R</i> <sub>1</sub> , <i>wR</i> <sub>2</sub> (all data)**                           | 0.0365, 0.0946                                                  | 0.0905, 0.1280                                                    |

\*  $R = \sum(F_o - F_c) / \sum(F_o)$ , \*\*  $wR_2 = \{\sum[w(F_o^2 - F_c^2)^2] / \sum(F_o^2)^2\}^{1/2}$ .

**Table S2.** Selected bond distances (Å) and angles (deg) for **1-2**

| 1                    |            |                      |            |
|----------------------|------------|----------------------|------------|
| Cd(1)-O(1)           | 2.167(3)   | Cd(1)-O(1W)#1        | 2.390(3)   |
| Cd(1)-O(8)#1         | 2.334(2)   | Cd(1)-O(1)#2         | 2.167(3)   |
| Cd(1)-O(1W)#3        | 2.390(3)   | Cd(1)-O(8)#3         | 2.334(2)   |
| Cd(2)-O(1W)          | 2.347(3)   | Cd(2)-O(2W)          | 2.224(4)   |
| Cd(2)-O(9)           | 2.230(2)   | Cd(2)-O(6)#4         | 2.336(2)   |
| Cd(2)-O(2)#5         | 2.264(2)   | Cd(2)-O(6)#6         | 2.301(2)   |
| 2                    |            |                      |            |
| Cd(1)-O(1)           | 2.419(4)   | Cd(1)-O(2)           | 2.495(3)   |
| Cd(1)-O(10)          | 2.276(4)   | Cd(1)-N(1)           | 2.348(4)   |
| Cd(1)-N(2)           | 2.344(4)   | Cd(1)-O(5)#1         | 2.674(4)   |
| Cd(1)-O(6)#1         | 2.258(3)   |                      |            |
| 1                    |            |                      |            |
| O(1)-Cd(1)-O(1W)#1   | 98.62(10)  | O(1)-Cd(1)-O(8)#1    | 91.36(9)   |
| O(1)-Cd(1)-O(1W)#3   | 81.38(10)  | O(1)-Cd(1)-O(8)#3    | 88.64(9)   |
| O(1W)#1-Cd(1)-O(8)#1 | 95.35(9)   | O(1)#2-Cd(1)-O(1W)#1 | 81.38(10)  |
| O(1W)#1-Cd(1)-O(8)#3 | 84.65(9)   | O(1)#2-Cd(1)-O(8)#1  | 88.64(9)   |
| O(1W)#3-Cd(1)-O(8)#3 | 95.35(9)   | O(1)#2-Cd(1)-O(8)#3  | 91.36(9)   |
| O(1W)-Cd(2)-O(2W)    | 177.20(10) | O(1W)-Cd(2)-O(9)     | 88.19(9)   |
| O(1W)-Cd(2)-O(6)#4   | 97.17(8)   | O(1W)-Cd(2)-O(2)#5   | 84.85(9)   |
| O(1W)-Cd(2)-O(6)#6   | 85.20(8)   | O(2W)-Cd(2)-O(9)     | 94.46(11)  |
| O(2W)-Cd(2)-O(6)#4   | 83.97(11)  | O(2)#5-Cd(2)-O(2W)   | 93.08(11)  |
| O(2W)-Cd(2)-O(6)#6   | 92.64(10)  | O(6)#6-Cd(2)-O(9)    | 158.36(9)  |
| 2                    |            |                      |            |
| O(1)-Cd(1)-O(2)      | 52.42(11)  | O(1)-Cd(1)-O(10)     | 110.35(14) |
| O(1)-Cd(1)-N(1)      | 122.25(11) | O(1)-Cd(1)-N(2)      | 92.26(13)  |
| O(1)-Cd(1)-O(5)#1    | 141.10(11) | O(1)-Cd(1)-O(6)#1    | 89.94(12)  |
| O(2)-Cd(1)-O(10)     | 82.32(12)  | O(2)-Cd(1)-N(1)      | 83.64(12)  |
| O(2)-Cd(1)-N(2)      | 113.43(12) | O(2)-Cd(1)-O(5)#1    | 163.25(11) |
| O(2)-Cd(1)-O(6)#1    | 134.76(11) | O(10)-Cd(1)-N(1)     | 96.14(14)  |
| O(10)-Cd(1)-N(2)     | 157.38(15) | O(5)#1-Cd(1)-O(10)   | 82.50(13)  |
| O(6)#1-Cd(1)-O(10)   | 90.51(13)  | N(1)-Cd(1)-N(2)      | 70.90(14)  |
| O(5)#1-Cd(1)-N(1)    | 91.00(13)  | O(6)#1-Cd(1)-N(1)    | 144.60(13) |
| O(5)#1-Cd(1)-O(6)#1  | 52.37(12)  | O(5)#1-Cd(1)-N(2)    | 79.37(13)  |

Symmetry Cddes: **For 1:** #1 = x, y, -1+z; #2 = 1-x, 2-y, -z; #3 = 1-x, 2-y, 1-z; #4 = -1+x, y, z; #5 = x, y, 1+z; #6 = 1-x, 1-y, 2-z. **For 2:** #1 = 1+x, -y, -1+z.
